# Supplementary material
Source: Springer Nature journal article supplement (https://www.springermedizin.de/resource/supplementary/12884_2013_1044_MOESM1_ESM.pdf/9458792)
Supplement: MOESM1 [file 9458792]

Independent Variables

Dependent Variables

Predisposing characteristics

- Socio cultural factors

Enabling characteristics

- Accessibility (economic and physical)

Need based characteristics

- Perceived benefits / needs

Utilization of ANC

↓  
Skilled delivery  
Postnatal Care

First delay  
(Delay in seeking care)

Second delay  
(Delay in reaching care)

Third delay  
(Delay receiving quality care in facilities)
